# Supplementary material
Source: MDPI journal article supplement (https://www.mdpi.com/2071-1050/12/4/1302)
Supplement: s1 [file s1]

**Questionnaire.** A Survey of Second Foreign Language Learning for English Majors**Questions about yourself**

Q1 Please indicate your gender.

- 1 Male
- 2 Female

Q2 What is your academic rank?

- 1 The top 5%
- 2 The top 5–10%
- 3 The top 10–20%
- 4 The top 20–50%
- 5 The top 50–80%
- 6 The bottom 20%

Q3 Which university do you come from?

- 1 Xi'an Jiaotong University
- 2 Northwestern Polytechnical University
- 3 Northwest A&F University
- 4 Northwest University
- 5 Xidian University
- 6 Chang'an University
- 7 Shaanxi Normal University

Q4 What is your plan after graduation?

- 1 Get postgraduate recommendation
- 2 Participate in postgraduate entrance examination
- 3 Study abroad
- 4 Seek a job
- 5 Other (Please indicate your plan after graduation: \_\_\_\_\_)

**Questions about your second foreign language learning**

Q5 Which second foreign language are you learning?

- 1 French
- 2 German
- 3 Japanese
- 4 Korean
- 5 Spanish
- 6 Russian
- 7 Arabic
- 8 Other (Please indicate your second foreign language: \_\_\_\_\_)

Q6 How do you learn the second foreign language?

- 1 By on-campus courses only
- 2 By on-campus plus off-campus face-to-face courses
- 3 By on-campus plus off-campus online courses

4 Other (Please indicate your learning approach: \_\_\_\_\_)

Q7 As to your learning motivation, to what extent do you agree with the following statements?

|          |                                                                                                      | Strongly disagree | Disagree | Neither agree nor disagree | Agree | Strongly agree | Don't know |
|----------|------------------------------------------------------------------------------------------------------|-------------------|----------|----------------------------|-------|----------------|------------|
| <b>a</b> | I learn the language because I am interested in the language itself.                                 | 1                 | 2        | 3                          | 4     | 5              | 6          |
| <b>b</b> | I learn the language because I enjoy the relevant culture of the language.                           | 1                 | 2        | 3                          | 4     | 5              | 6          |
| <b>c</b> | I learn the language because it can satisfy my entertainment needs (including watching shows).       | 1                 | 2        | 3                          | 4     | 5              | 6          |
| <b>d</b> | I learn the language because it can help me gain more recognition in society.                        | 1                 | 2        | 3                          | 4     | 5              | 6          |
| <b>e</b> | I learn the language because it can help me get more income after graduation.                        | 1                 | 2        | 3                          | 4     | 5              | 6          |
| <b>f</b> | I learn the language because I want to further study or work abroad in the target country or region. | 1                 | 2        | 3                          | 4     | 5              | 6          |

Q8 As to your learning enjoyment, to what extent do you agree with the following statement?

|          |                                               | Strongly disagree | Disagree | Neither agree nor disagree | Agree | Strongly agree | Don't know |
|----------|-----------------------------------------------|-------------------|----------|----------------------------|-------|----------------|------------|
| <b>a</b> | I enjoy learning the second foreign language. | 1                 | 2        | 3                          | 4     | 5              | 6          |

Q9 How about your second foreign language proficiency?

|          |                                                  | Very bad | Bad | Neither good nor bad | Good | Very good | Don't know |
|----------|--------------------------------------------------|----------|-----|----------------------|------|-----------|------------|
| <b>a</b> | My second foreign language listening proficiency | 1        | 2   | 3                    | 4    | 5         | 6          |
| <b>b</b> | My second foreign language speaking proficiency  | 1        | 2   | 3                    | 4    | 5         | 6          |
| <b>c</b> | My second foreign language reading proficiency   | 1        | 2   | 3                    | 4    | 5         | 6          |
| <b>d</b> | My second foreign language writing proficiency   | 1        | 2   | 3                    | 4    | 5         | 6          |
